# Supplementary material
Source: publisher figshare collection journal article supplement (https://acs.figshare.com/ndownloader/files/12768083)
Supplement: Supplementary file 1 [file 12768083]

## Supplementary Materials

# Low-fouling characteristics of ultrathin zwitterionic cysteine SAMs

*Peter Lin,<sup>†</sup> Tsung-Liang Chuang,<sup>‡</sup> Paul Z. Chen,<sup>†</sup> Chii-Wann Lin,<sup>‡</sup> and Frank X. Gu<sup>\*,‡,§</sup>*

<sup>†</sup>Department of Chemical Engineering, Waterloo Institute for Nanotechnology, University of Waterloo, Waterloo, Ontario N2L 3G1, Canada

<sup>‡</sup>Graduate Institute of Biomedical Engineering, Department of Electrical Engineering, National Taiwan University, Taipei 106, Taiwan

<sup>§</sup>Department of Chemical Engineering & Applied Chemistry, University of Toronto, Toronto, Ontario M5T 3A1, Canada

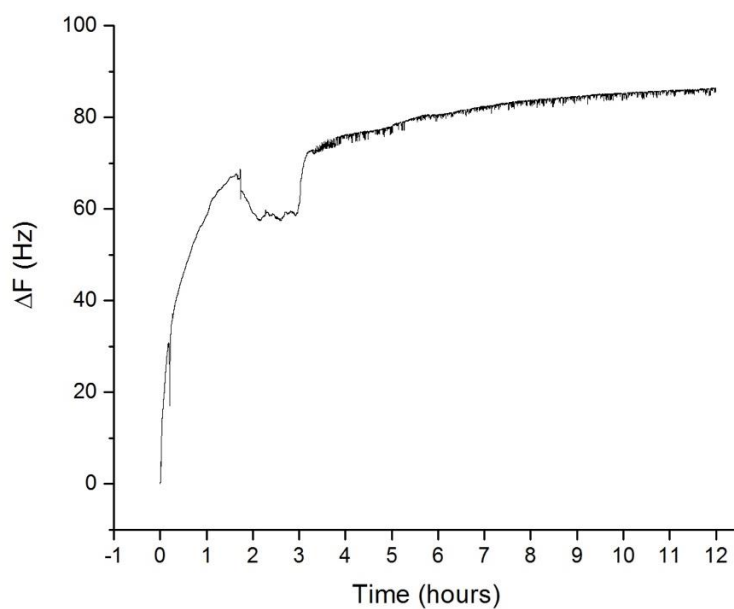

**Figure S1.** PBS rinse following cysteine SAM formation. The QCM results indicate that physisorbed cysteine molecules are continually removed during the 12 h of post-exposure PBS rinse. The sudden deviation in the response between 1.5 h and 3 h is most likely caused by an artifact response in the system.

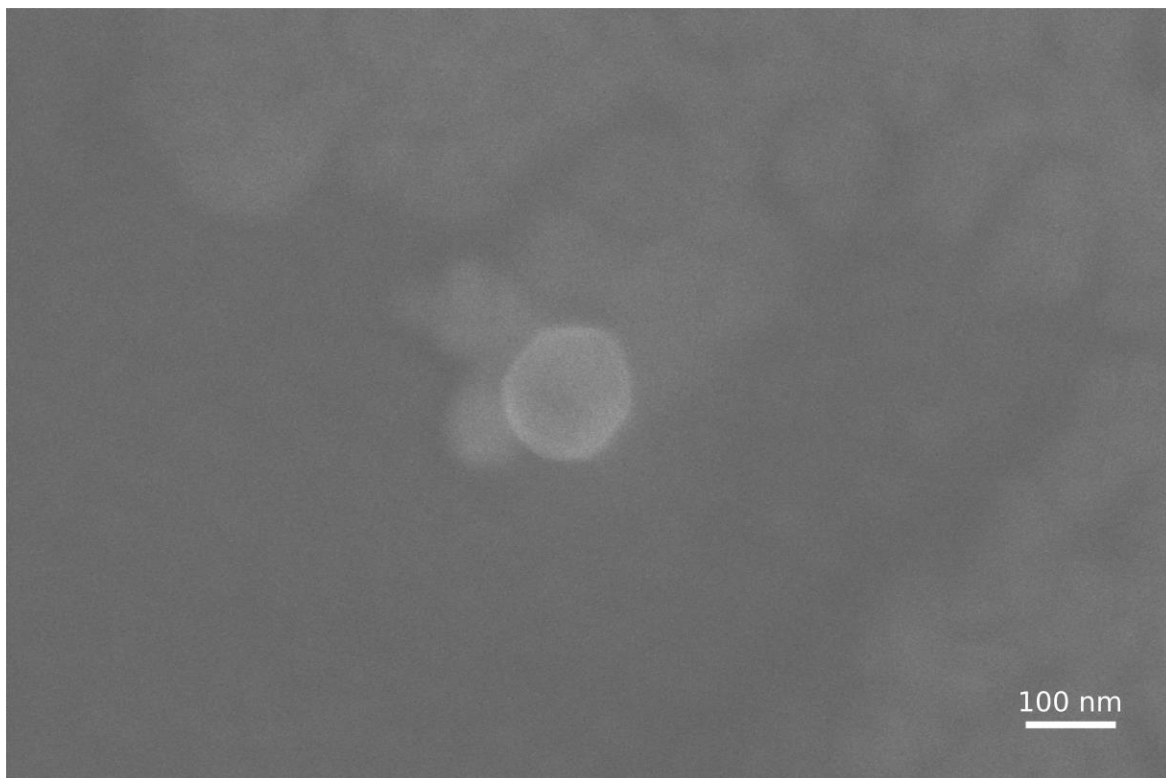

**Figure S2.** SEM image of a characteristic spherical BSA cluster.
